# Supplementary material for: Increased cellular detoxification, cytoskeletal activities and protein transport explain physiological stress in a lagoon sponge
Source: Oxford University Press journal article supplement (doi:10.1242/jeb.242820), 2021-10-18
Supplement: jeb242820supp.pdf [file jeb242820supp.pdf]

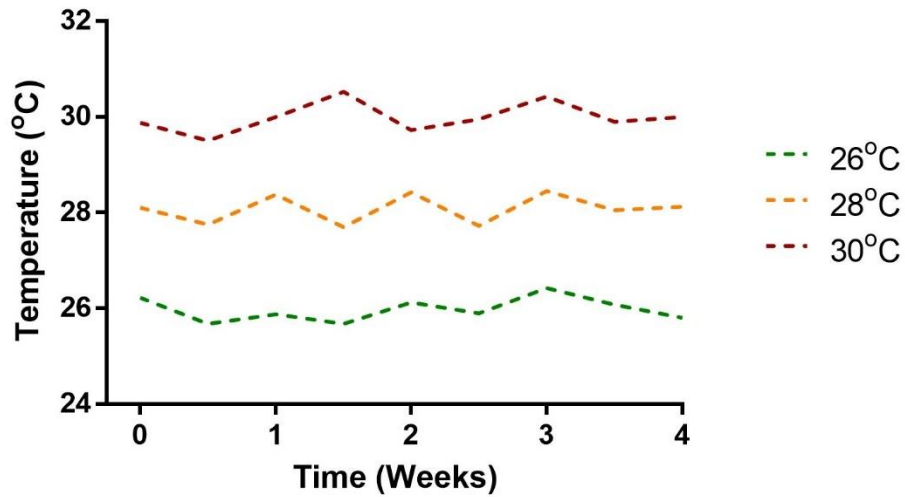

**Fig. S1.** Temperature fluctuations in treatment tanks during the experiments. Reported values were measured daily at 3-hours intervals using temperature loggers.

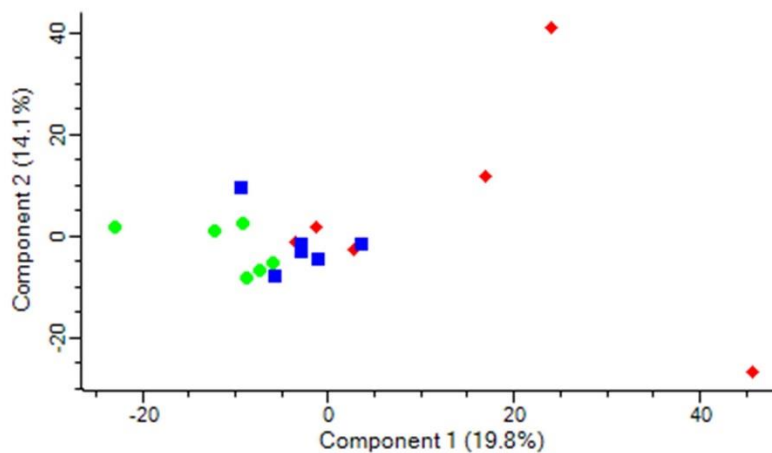

**Fig. S2.** Principal Component Analysis (PCA) plot of significantly abundant proteins in *Amphimedon navalis* at 26 °C (filled circles), 28 °C (filled squares) and 30 °C (filled diamonds). PCA was constructed using all detected proteins. Each point represents a biological sponge replicate (n = 6 per treatment).

**Table S1.** Results of time \* temperature *post hoc* pairwise comparisons test (with the sequential Sidak correction applied) from general linear mixed models for percentage change in buoyant weight, holobiont oxygen consumption and pumping rates of *Amphimedon navalis* in response to elevated temperature. Significant p-values are reported in bold. (n = 9 *per* treatment *per* time point)

| Time (Weeks)                             | Temp | Contrast Estimate | Std. Error | t     | df      | P  | CI (lower)       | CI (upper) |        |
|------------------------------------------|------|-------------------|------------|-------|---------|----|------------------|------------|--------|
| <b>Buoyant weight</b>                    |      |                   |            |       |         |    |                  |            |        |
| <b>0</b>                                 | 28°C | 26°C              | -          | -     | -       | -  | -                | -          |        |
|                                          | 30°C | 26°C              | -          | -     | -       | -  | -                | -          |        |
|                                          | 30°C | 28°C              | -          | -     | -       | -  | -                | -          |        |
| <b>1</b>                                 | 28°C | 26°C              | -0.007     | 0.002 | -2.830  | 60 | <b>0.013</b>     | -0.013     | -0.001 |
|                                          | 30°C | 26°C              | -0.009     | 0.002 | -3.620  | 60 | <b>0.002</b>     | -0.015     | -0.003 |
|                                          | 30°C | 28°C              | -0.002     | 0.002 | -0.790  | 60 | 0.433            | -0.007     | 0.003  |
| <b>2</b>                                 | 28°C | 26°C              | -0.012     | 0.002 | -4.783  | 60 | <b>&lt;0.001</b> | -0.017     | -0.006 |
|                                          | 30°C | 26°C              | -0.018     | 0.002 | -7.280  | 60 | <b>&lt;0.001</b> | -0.024     | -0.012 |
|                                          | 30°C | 28°C              | -0.006     | 0.002 | -2.497  | 60 | <b>0.015</b>     | -0.011     | -0.001 |
| <b>3</b>                                 | 28°C | 26°C              | -0.016     | 0.002 | -6.537  | 60 | <b>&lt;0.001</b> | -0.022     | -0.010 |
|                                          | 30°C | 26°C              | -0.026     | 0.002 | -10.396 | 60 | <b>&lt;0.001</b> | -0.032     | -0.020 |
|                                          | 30°C | 28°C              | -0.010     | 0.002 | -3.859  | 60 | <b>&lt;0.001</b> | -0.014     | -0.005 |
| <b>4</b>                                 | 28°C | 26°C              | -0.020     | 0.002 | -8.209  | 60 | <b>&lt;0.001</b> | -0.026     | -0.015 |
|                                          | 30°C | 26°C              | -0.034     | 0.002 | -13.751 | 60 | <b>&lt;0.001</b> | -0.040     | -0.028 |
|                                          | 30°C | 28°C              | -0.014     | 0.002 | -5.542  | 60 | <b>&lt;0.001</b> | -0.019     | -0.009 |
| <b>Holobiont oxygen consumption rate</b> |      |                   |            |       |         |    |                  |            |        |
| <b>0</b>                                 | 28°C | 26°C              | -0.001     | 0.003 | -0.247  | 27 | 0.993            | -0.009     | 0.007  |
|                                          | 30°C | 26°C              | -0.001     | 0.003 | -0.003  | 27 | 0.998            | -0.007     | 0.006  |
|                                          | 30°C | 28°C              | 0.001      | 0.003 | 0.245   | 27 | 0.993            | -0.007     | 0.009  |
| <b>1</b>                                 | 28°C | 26°C              | 0.003      | 0.003 | 1.066   | 27 | 0.504            | -0.004     | 0.011  |
|                                          | 30°C | 26°C              | 0.005      | 0.003 | 1.687   | 27 | 0.279            | -0.003     | 0.013  |
|                                          | 30°C | 28°C              | 0.002      | 0.003 | 0.621   | 27 | 0.540            | -0.005     | 0.008  |
| <b>2</b>                                 | 28°C | 26°C              | 0.005      | 0.003 | 1.539   | 27 | 0.135            | -0.002     | -0.004 |
|                                          | 30°C | 26°C              | 0.012      | 0.003 | 3.670   | 27 | <b>0.003</b>     | 0.004      | 0.020  |
|                                          | 30°C | 28°C              | 0.007      | 0.003 | 2.131   | 27 | 0.083            | -0.001     | 0.014  |
| <b>3</b>                                 | 28°C | 26°C              | 0.007      | 0.003 | 2.224   | 27 | <b>0.035</b>     | 0.001      | 0.014  |
|                                          | 30°C | 26°C              | 0.016      | 0.003 | 5.159   | 27 | <b>&lt;0.001</b> | 0.008      | 0.024  |
|                                          | 30°C | 28°C              | 0.009      | 0.003 | 2.935   | 27 | <b>0.014</b>     | 0.002      | 0.017  |
| <b>4</b>                                 | 28°C | 26°C              | 0.009      | 0.003 | 2.690   | 27 | <b>0.012</b>     | 0.002      | 0.015  |
|                                          | 30°C | 26°C              | 0.020      | 0.003 | 6.224   | 27 | <b>&lt;0.001</b> | 0.012      | 0.028  |
|                                          | 30°C | 28°C              | 0.011      | 0.003 | 3.534   | 27 | <b>0.003</b>     | 0.004      | 0.019  |

| Time (Weeks)        | Temp |      | Contrast Estimate | Std. Error | t      | df | P                | CI (lower) | CI (upper) |
|---------------------|------|------|-------------------|------------|--------|----|------------------|------------|------------|
| <i>Pumping rate</i> |      |      |                   |            |        |    |                  |            |            |
| <b>0</b>            | 28°C | 26°C | 0.008             | 0.003      | 2.801  | 38 | <b>0.024</b>     | 0.001      | 0.015      |
|                     | 30°C | 26°C | 0.006             | 0.003      | 2.032  | 38 | 0.096            | -0.001     | 0.013      |
|                     | 30°C | 28°C | -0.002            | 0.003      | -0.769 | 38 | 0.447            | -0.008     | 0.004      |
| <b>1</b>            | 28°C | 26°C | 0.009             | 0.003      | 3.273  | 38 | <b>0.005</b>     | 0.003      | 0.016      |
|                     | 30°C | 26°C | 0.013             | 0.003      | 4.404  | 38 | <b>&lt;0.001</b> | 0.005      | 0.020      |
|                     | 30°C | 28°C | 0.003             | 0.003      | 1.131  | 38 | 0.265            | -0.003     | 0.009      |
| <b>2</b>            | 28°C | 26°C | 0.010             | 0.003      | 3.338  | 38 | <b>0.004</b>     | 0.003      | 0.016      |
|                     | 30°C | 26°C | 0.018             | 0.003      | 6.431  | 38 | <b>&lt;0.001</b> | 0.011      | 0.026      |
|                     | 30°C | 28°C | 0.009             | 0.003      | 3.094  | 38 | <b>0.004</b>     | 0.003      | 0.015      |
| <b>3</b>            | 28°C | 26°C | 0.020             | 0.003      | 6.999  | 38 | <b>&lt;0.001</b> | 0.013      | 0.027      |
|                     | 30°C | 26°C | 0.033             | 0.003      | 11.401 | 38 | <b>&lt;0.001</b> | 0.026      | 0.040      |
|                     | 30°C | 28°C | 0.013             | 0.003      | 4.402  | 38 | <b>&lt;0.001</b> | 0.007      | 0.018      |
| <b>4</b>            | 28°C | 26°C | 0.022             | 0.003      | 7.743  | 38 | <b>&lt;0.001</b> | 0.016      | 0.029      |
|                     | 30°C | 26°C | 0.040             | 0.003      | 13.980 | 38 | <b>&lt;0.001</b> | 0.003      | 0.047      |
|                     | 30°C | 28°C | 0.018             | 0.003      | 6.237  | 38 | <b>&lt;0.001</b> | 0.012      | 0.024      |

**Table S2.** Results of pairwise comparisons between temperature treatments for differentially abundant proteins from *Amphimedon navalis* from Miss test using an FDR threshold of 0.1 and log-ratio (fold-change) of  $\pm 0.25$ . Significant p-values are reported in bold.

| Uniprot Accession number                              | Protein annotation                                              | Proteins in cluster | 26°C vs 28°C    | 26°C vs 30°C    | 28°C vs 30°C    |
|-------------------------------------------------------|-----------------------------------------------------------------|---------------------|-----------------|-----------------|-----------------|
| <b>Oxidation-reduction process (Oxidative stress)</b> |                                                                 |                     |                 |                 |                 |
| A0A1X7V4C4                                            | Aldedh domain-containing protein                                | 2                   | <b>1.22E-05</b> | <b>5.24E-06</b> | 0.980313        |
| IIGFQ7                                                | Ferritin                                                        | 2                   | <b>3.53E-06</b> | <b>5.24E-06</b> | 1               |
| A0A1X7SUN1                                            | VOC domain-containing protein                                   | 2                   | 0.831446        | <b>0.054828</b> | 1               |
| A0A1X7VNW3                                            | Catalase (Heme cofactor)                                        | 2                   | 0.311372        | <b>0.001572</b> | <b>0.090423</b> |
| A0A1X7VQL2                                            | Uncharacterized (Thioredoxin-like superfamily)                  | 1                   | 1               | <b>0.012566</b> | <b>0.090423</b> |
| A0A1X7UNX4                                            | Uncharacterized (Glutathione S-transferase superfamily)         | 1                   | 1               | 0.192653        | <b>0.050264</b> |
| A0A1X7T3Q9                                            | E1_dh domain-containing protein                                 | 2                   | 1               | <b>0.000314</b> | <b>0.003458</b> |
| A0A1X7VJL6                                            | Peroxiredoxin                                                   | 1                   | 0.83146         | <b>0.049142</b> | 1               |
| A0A1X7U633                                            | Cytochrome c domain-containing protein                          | 2                   | 0.795518        | <b>0.000314</b> | <b>0.035267</b> |
| A0A1X7V4Y0                                            | Proton-translocating NAD(P) (+) transhydrogenase                | 1                   | <b>0.071665</b> | <b>0.063899</b> | 0.683634        |
| <b>Protein transport</b>                              |                                                                 |                     |                 |                 |                 |
| A0A1X7U4A4                                            | Protein kinase domain-containing protein                        | 1                   | <b>0.023796</b> | <b>0.047885</b> | 1               |
| A0A1X7UVI1                                            | Protein kinase domain-containing protein                        | 1                   | 0.559622        | <b>0.042849</b> | 0.683634        |
| A0A1X7VH72                                            | Uncharacterized (inositol phosphokinase family)                 | 1                   | <b>0.066834</b> | <b>0.012566</b> | 1               |
| A0A1X7V114                                            | Vacuolar protein sorting-associated protein 11 homolog          | 1                   | 0.63163         | <b>0.001937</b> | 0.115427        |
| A0A1X7UHM1                                            | Ras-related protein Rab-14                                      | 1                   | 1               | <b>0.055495</b> | 0.40943         |
| A0A1X7VLI5                                            | Protein kinase domain-containing protein                        | 1                   | 1               | <b>0.005623</b> | <b>0.03029</b>  |
| A0A1X7VL10                                            | ATP synthase subunit beta                                       | 1                   | <b>0.023366</b> | 0.207581        | 1               |
| A0A1X7VVN1                                            | Uncharacterized (ABC transporter-like family)                   | 1                   | <b>0.066834</b> | <b>0.001133</b> | <b>0.079628</b> |
| A0A1X7VJC1                                            | Uncharacterized (DUOXA family)                                  | 1                   | <b>0.024449</b> | 0.222406        | 0.683634        |
| A0A1X7VXP7                                            | Uncharacterized (SNF7 family)                                   | 1                   | <b>0.015008</b> | <b>0.003536</b> | 0.61806         |
| <b>Cytoskeletal organization</b>                      |                                                                 |                     |                 |                 |                 |
| A0A1X7UKK7                                            | Costars domain-containing protein                               | 1                   | <b>0.066834</b> | <b>0.001937</b> | 0.61806         |
| A0A1X7VU79                                            | Fascin                                                          | 1                   | <b>0.066834</b> | 0.2606          | 0.40943         |
| A0A1X7UPB4                                            | Tubulin alpha chain                                             | 1                   | <b>0.066834</b> | <b>0.000171</b> | 0.393734        |
| A0A1X7UIF6                                            | F-actin-capping protein subunit beta                            | 1                   | 1               | 0.680671        | <b>0.079628</b> |
| A0A1X7V1D4                                            | Tubulin alpha chain                                             | 1                   | <b>0.024449</b> | <b>5.24E-06</b> | <b>0.005016</b> |
| A0A1X7U6V8                                            | Septin-type G domain-containing protein                         | 2                   | <b>0.047777</b> | 1               | <b>0.005016</b> |
| A0A1X7VTE3                                            | Uncharacterized (small GTPase family)                           | 1                   | 0.232523        | <b>0.005506</b> | 0.269237        |
| A0A1X7UXJ8                                            | Uncharacterized (alpha-actinin family)                          | 1                   | <b>0.023366</b> | <b>0.008162</b> | 1               |
| A0A1X7V9U2                                            | Uncharacterized (WASH complex, subunit strumpellin)             | 1                   | 1               | <b>0.033781</b> | <b>0.090423</b> |
| A0A1X7U0F7                                            | PDZ domain-containing protein                                   | 1                   | 1               | <b>0.092884</b> | <b>0.954823</b> |
| <b>Signal transduction</b>                            |                                                                 |                     |                 |                 |                 |
| A0A1X7VAN2                                            | Calmodulin                                                      | 3                   | <b>0.004717</b> | <b>6.59E-07</b> | <b>0.090423</b> |
| A0A1X7UI48                                            | Histidine-tRNA ligase                                           | 1                   | <b>0.024449</b> | <b>5.24E-06</b> | 0.182332        |
| A0A1X7VIG0                                            | ADP-ribosylation factor 6 (Arf family)                          | 1                   | 0.318505        | <b>0.054828</b> | 0.683634        |
| <b>Protein translation</b>                            |                                                                 |                     |                 |                 |                 |
| A0A1X7VB92                                            | Aspartate-tRNA ligase, cytoplasmic                              | 1                   | <b>0.047777</b> | <b>0.009516</b> | 0.303402        |
| A0A1X7V8E5                                            | Uncharacterized (Universal ribosomal protein S8 family)         | 1                   | 1               | <b>0.000838</b> | 0.244596        |
| A0A1X7V0I1                                            | Ubiquitin - 60S ribosomal protein L40                           | 6                   | <b>0.023366</b> | <b>0.008763</b> | 0.090423        |
| <b>Protein catabolism</b>                             |                                                                 |                     |                 |                 |                 |
| A0A1X7VN30                                            | Proteasome subunit beta                                         | 2                   | <b>0.061227</b> | <b>0.001937</b> | <b>0.090423</b> |
| A0A1X7VGM8                                            | Palmitoyl-protein hydrolase 1                                   | 1                   | <b>0.089645</b> | 0.680671        | 1               |
| A0A1X7VV07                                            | Sulfatase domain-containing protein (Ca <sup>2+</sup> Cofactor) | 1                   | <b>0.003762</b> | <b>5.24E-06</b> | <b>0.090423</b> |

\*Table continues next page

| Uniprot Accession number | Protein annotation                                                                      | Proteins in cluster | 26°C vs 28°C    | 26°C vs 30°C    | 28°C vs 30°C    |
|--------------------------|-----------------------------------------------------------------------------------------|---------------------|-----------------|-----------------|-----------------|
| <b>Metabolic process</b> |                                                                                         |                     |                 |                 |                 |
| A0A1X7VEB3               | Adenosylhomocysteinase (NAD <sup>+</sup> cofactor)                                      | 1                   | <b>0.089645</b> | <b>0.000314</b> | <b>0.016798</b> |
| <b>Others</b>            |                                                                                         |                     |                 |                 |                 |
| A0A1X7SVR6               | Uncharacterized                                                                         | 4                   | <b>3.53E-06</b> | <b>5.24E-06</b> | 0.40943         |
| A0A1X7VMX7               | Septin-type G domain containing protein                                                 | 1                   | 0.831446        | <b>0.001133</b> | 0.576949        |
| A0A1X7SMT9               | Uncharacterized                                                                         | 1                   | <b>0.066834</b> | <b>0.012566</b> | 1               |
| A0A1X7VLW9               | Transket_pyr domain-containing protein (Co <sup>2+</sup> and Mg <sup>2+</sup> cofactor) | 1                   | 1               | <b>0.055495</b> | 0.40943         |
| A0A1X7V015               | DUF3504 domain-containing protein                                                       | 1                   | 1               | <b>0.040336</b> | 0.269237        |
| A0A1X7SJZ1               | Uncharacterized                                                                         | 3                   | 1               | <b>0.054828</b> | 0.683634        |
| A0A1X7SYB4               | Uncharacterized                                                                         | 1                   | 0.398718        | <b>0.054828</b> | <b>0.153691</b> |
| A0A1X7U869               | Store-operated calcium entry-associated regulatory factor                               | 1                   | 1               | <b>0.054143</b> | 0.393734        |
| A0A1X7VNC8               | Uncharacterized (RNA helicase family)                                                   | 1                   | 1               | <b>0.042849</b> | 0.116539        |
| A0A1X7T7Q1               | Uncharacterized                                                                         | 2                   | 0.24654         | <b>0.049142</b> | 0.393734        |

**Table S3.** Protein cluster report including identification probabilities, sequence coverage, and numbers of unique peptides and spectra.

[Click here to download Table S3](#)
